# The equivalent arc ratio for auditory space

W. Owen Brimijoin

MRC/CSO Institute of Hearing Research (Scottish Section)

Glasgow Royal Infirmary

10-16 Alexandra Parade

Glasgow G31 2ER, UK

Phone: +44 141 201 8750

Email: [owen.brimijoin@nottingham.ac.uk](mailto:owen.brimijoin@nottingham.ac.uk)

## 1 Abstract

2 The minimum audible movement angle increases as a function of source azimuth. If listeners do not  
3 perceptually compensate for this change in acuity, then sounds rotating around the head should  
4 appear to move faster at the front than at the side. We examined whether judgments of relative  
5 amounts of acoustic motion depend on signal center angle and found that the azimuth of two signals  
6 strongly affects their point of subjective similarity for motion. Signal motion centered at 90° had to  
7 be roughly twice as large as motion centered at 0° to be judged as equivalent. This distortion of  
8 acoustic space around the listener suggests that the perceived velocity of moving sound sources  
9 changes as a function of azimuth around the head. The “equivalent arc ratio,” a mathematical  
10 framework based on these results, is used to successfully provide quantitative explanations for  
11 previously documented discrepancies in spatial localization, motion perception, and head-to-world  
12 coordinate transformations.

## 13 1 Introduction

14 The binaural cues that are used to construct our internal representation auditory space are  
15 interaural time difference (ITD) and interaural level difference (ILD). Both of these arise from the  
16 physical structure of the head, as sounds arrive at the ear closest to the sound source both earlier  
17 and at a higher level than at the further ear. Measurements of these binaural cues as a function of  
18 sound source angle demonstrate that they change most rapidly at the front of a listener [1, 2]. If the  
19 internal representation of space were based purely on these cues, then listeners would have  
20 increased spatial resolution near the sagittal plane. Indeed this is well supported: both the threshold  
21 measurements of minimum audible angle (MAA) and minimum audible movement angle (MAMA)  
22 are known to change as a function of source azimuth [3, 4].

23 The study described here examined a potential consequence of this representation of auditory  
24 space: namely that if listeners do not perceptually compensate for it, then the expansion of  
25 resolution at the front and contraction at the side would dictate that a sound rotating at a constant  
26 angular velocity around the head would not appear to do so, but would instead appear to move  
27 faster at the front than at the side. Correspondingly, listeners turning their heads at a constant  
28 velocity would experience an angle-dependent change in apparent source movement. The literature  
29 on auditory motion is unclear on this subject and to our knowledge no studies have directly  
30 examined the perceived difference in auditory motion at different angles and directions relative to  
31 the head. That said, a number of curious discrepancies in spatial auditory perception have been  
32 described over the years. Some of these have been classed as ‘incomplete coordinate  
33 transformations’ [5], suggesting that a person’s head angle may affect the direction from which they  
34 perceive a sound to emanate. Similarly, studies have reported discrepancies in listeners’ subtraction  
35 of their own active head movements from the movement of the auditory scene [6, 7].

36 Although the latter two studies used Bayesian inference as a description of their observations, no  
37 mathematical framework has been suggested to account for these findings. We propose instead that

38 these and a number of other discrepancies in spatial hearing could be explained via an angle-  
39 dependent distortion in apparent sound location and motion. The underlying hypotheses to be  
40 tested can be more formally stated as follows: first, that relative velocity judgements should change  
41 as a function of azimuth, and second, that a quantitative model based on any observed expansion of  
42 space should capture static phenomena such as sound source eccentricity overestimation [8-11] and  
43 dynamic phenomena like inconsistent self-motion subtraction [6, 7]. We further argue that the  
44 MAMA is not simply a measure of acuity, rather it underlies a constant perceptual unit, changing in  
45 absolute magnitude across space. One could argue that as a threshold measurement, roughly 1-2  
46 degrees at the front of a listener may be considered equivalent to roughly 4 degrees at the side of  
47 the listener in that these are the minimal amounts of motion required for a listener to change their  
48 judgement from no motion to ‘some motion.’ Whether a similar azimuth-dependent expansion in  
49 the perception of auditory space exists at suprathreshold levels has never been directly  
50 demonstrated.

51 We term the proposed relationship of equal perceptual units across angle the “equivalent arc ratio”  
52 for auditory space, borrowing terminology from the equivalent rectangular bandwidth [12]. Here we  
53 quantify perceptual expansion by measuring the dependence of judgements of relative sound-source  
54 motion on the angles with respect to the head from which the signals arrive. The consequences of  
55 such a nonlinear representation of space are discussed, as is the potential for ‘hyper-stable’ virtual  
56 acoustics. Finally, successful quantitative comparisons are made between the predictions of a  
57 proposed mathematical framework and the results of a number of previously published studies.

## 58 2 Results

### 59 2.1 Relative motion judgements

60 Listeners were asked to make a judgement about which of two signals, a reference and a test signal,  
61 “moved more.” The reference always moved 20° and the test moved less, the same, or more. Both  
62 the test and reference signals could be centered at 0°, 45°, or 90°, and movement direction and the

63 order of presentation and condition were fully randomized. Across all conditions we found that the  
64 center azimuth of both test and reference signals strongly affected subjects' comparison of relative  
65 extents of motion, as expressed by a change in response as a function of test excursion. We found  
66 main effects of test excursion, test azimuth, and reference azimuth ( $F(1,6) = 338.11$ ,  $p < 0.05$ ,  $F(1,2) =$   
67  $71.34$ ,  $p < 0.05$ , and  $F(1,2) = 97.74$ ,  $p < 0.05$ , respectively), an interaction between reference azimuth  
68 and test excursion ( $F(2,12) = 3.99$ ,  $p < 0.05$ ), an interaction between test azimuth and test excursion  
69 ( $F(2,12) = 34.24$ ,  $p < 0.05$ ), and a 3-way interaction between reference azimuth, test azimuth, and  
70 test excursion ( $F(2,24) = 1.92$ ,  $p < 0.05$ ). The only insignificant comparison in the test was found in  
71 the interaction between test and reference azimuths ( $F(2,4) = 0.76$ ,  $p = 0.55$ ).

72 Figure 1a illustrates this phenomenon for reference signals centered at  $0^\circ$ . Test signals centered at  $0^\circ$   
73 (orange line) were judged to move the same amount as the  $20^\circ$  reference motion when the test

**FIGURE 1**

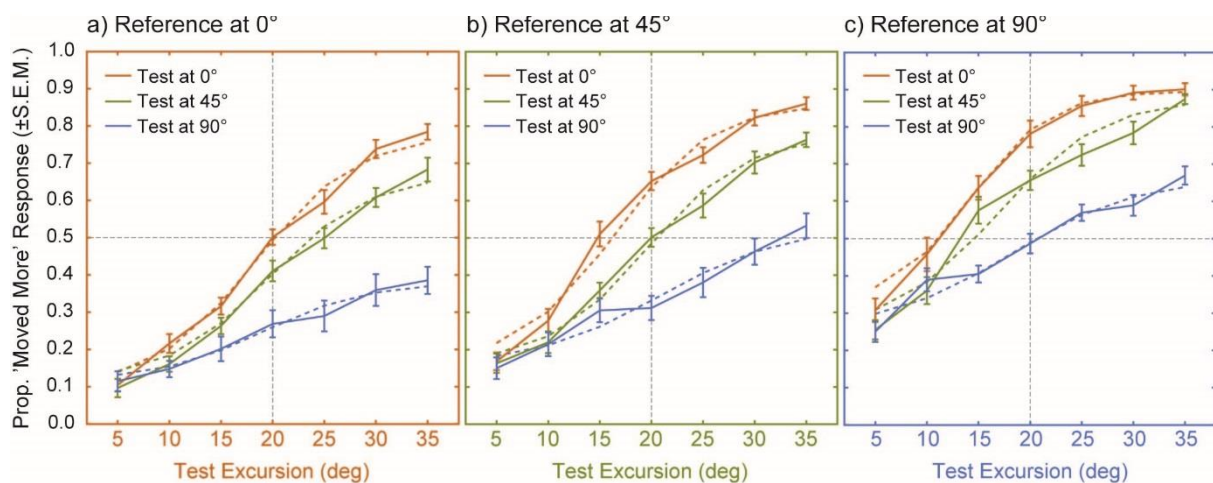

74 signals also moved by  $20^\circ$ . Thus the point of subjective equality (PSE) for this condition was roughly  
75  $20/20 = 1$ . The smooth psychometric function confirms that listeners were capable of making  
76 judgements of relative motion, which is also reflected in the significant main effect of test excursion.  
77 On the other hand, test signals centered at  $45^\circ$  (green line) had to move by about  $25^\circ$  to be judged as  
78 moving the same amount as the  $20^\circ$  movement of the reference signal at the front. The range of  
79 movement angles we used was not sufficient to estimate how much a  $90^\circ$  test signal (blue line) had

80 to be moved to reach the PSE with a reference at 0°, but the required excursion was likely much  
81 greater than 35°. In Figure 1b it can be seen that when compared to reference signals at 45°, test  
82 signals at 0° had to be moved significantly less to be perceived as moving the same amount, and test  
83 signals at 90° had to be moved significantly more. Finally, reference signals at 90° (Figure 1c) showed  
84 a pattern of expansion that was roughly inverted as compared to Figure 1a. Here it can be seen that  
85 motion at 0° had to be roughly half as large to be judged as equivalent to motion at 90°.

## 86 2.2 Points of subjective equality for motion

87 PSE ratios were drawn from the individual logistic fits to the data (the *mean* of said fits are plotted  
88 with dotted lines in Figure 1). The point at which the logistic fit crossed 0.5 probability was taken for  
89 each condition for each listener and divided by the reference motion PSE. PSE ratios were also  
90 computed for inverted pairs (i.e., the test/reference ratio 0/90 is accompanied by 1/the  
91 test/reference ratio 90/0). A scatter plot of these PSE ratios, plotted as a function of the absolute  
92 difference between the test and reference angles, is shown in Figure 2. The use of ‘comparison’ in

FIGURE 2

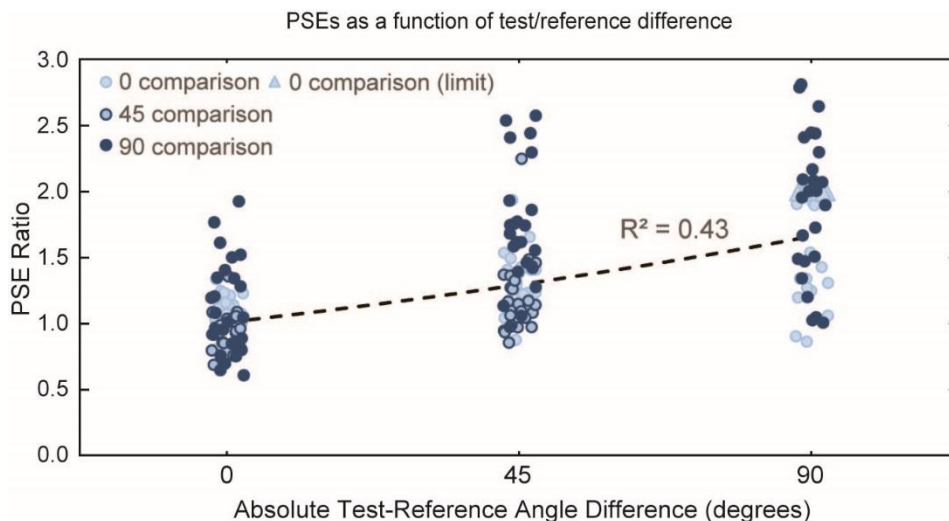

93 the legend is due to the mix of normal and inverted pairs (where reference and test are used  
94 interchangeably). When the test and reference motions were identical the PSE ratios were clustered  
95 around 1, albeit with a large degree of intersubject variability. PSE ratios for a difference of 45° were

96 on average larger than 1.0, and ratios for a 90° difference were still larger, reaching a value of  
97 roughly 2. It should be noted that the triangle symbols in the plot represent measurements in which  
98 the test signals at maximum excursion were still not judged to be moving by the same amount as the  
99 20° reference motion. The true values for these data points cannot be reliably estimated as the  
100 psychometric functions in question did not cross the PSE, but examining the individual data and  
101 logistic fits makes it clear that the values are likely to be substantially larger than 2. The Pearson  
102 correlation coefficient between the PSE ratio and the difference in test/reference angle is  $R^2$  of 0.43.

## 103 3 Discussion

### 104 3.1 The non-uniformity of acoustic motion

105 The observed changes in the apparent amount of motion across azimuth are not subtle, making it  
106 somewhat surprising that this effect has not been previously reported. Across all conditions we  
107 found that the relative azimuth of two signals strongly affects their point of subjective similarity for  
108 motion. Roughly speaking, 20° of motion at the front of the listeners is treated equivalently to 40° of  
109 motion at the sides. This difference in PSE ratio over azimuth, which we will refer to as the  
110 equivalent arc ratio from here onward, represents a perceptual expansion of space at the front and a  
111 contraction at the sides. On one level, the equivalent arc ratio could be interpreted as a simple  
112 relationship between acuity and perception, but this belies two perceptual consequences. One  
113 consequence is that a sound rotating at a constant angular velocity around the head would appear to  
114 accelerate towards the front of the listener, and decelerate towards the side. The second  
115 consequence is that – from the perspective of a moving listener –the acoustic world not appear  
116 stable as the head turns. Instead signals at the front should appear to counter-rotate as the listener  
117 turns, and signals at the side should seem to be slightly dragged along with the listener's rotation.

### 118 3.2 Distortion in acoustic location

119 There are two possibilities for reconciling the observed change in perceived motion as a function of  
120 angle with our current understanding of sound localization. The first requires a disassociation

121 between movement and location; in this case the apparent location of a signal at the end point of a  
122 movement would have to be different from its apparent position(s) during the movement. There is  
123 evidence in the visual system of just such disassociation [13]. It is conceivable that a similar process  
124 occurs in the auditory system, but the disassociation in the visual system is thought to arise from  
125 specialized motion-sensitive neurons in the middle temporal visual and medial superior temporal  
126 areas [14], brain regions known for motion selectivity [15, 16]. Motion-specific processing has been  
127 observed in posterior auditory cortex [17], however, there remains little physiological evidence for  
128 auditory neurons that exhibit motion selectivity while being agnostic to spatial location.

129 If we assume, on the other hand, that auditory motion and spatial location are intrinsically linked  
130 with each other, then the second possibility is that both the motion and the perceptual location of  
131 *static* sound sources would be subtly distorted as a function of head angle. This framework prevents  
132 any jump in perceived location after a movement (as would be found above), but requires that  
133 listeners mislocalize sound sources. The function and its constants were chosen so that its slope at 0°  
134 and its slope at 90° were related to each other in the same manner as the equivalent arc ratio  
135 between these two angles. We used a hyperbolic tangent (Equation 1) because it is readily invertible,  
136 although one could in principle also use a sine-expansion, or some other mathematical construct.

137 Equation 1:

$$138 \theta_p = \frac{\tanh(\theta_a \log(R t - c))}{\tanh(\log(R t - c))}$$

139 where all angles are degrees / 90 (including  $\theta_a$ ),  $\ln$  is the natural logarithm,  $t$  is a constant equal to  
140 7.08,  $c$  is a constant equal to 5.97,  $R$  is the ratio between the PSE at 90° and at 0°,  $\theta_a$  is the actual  
141 position of a signal, and  $\theta_p$  is the perceived position of that signal. The constants  $t$  and  $c$  were  
142 empirically derived (using Matlab's `fminsearch` function) to ensure that the ratio between its 20°  
143 slope (the amount of reference motion) at 0° and at 90° was closest to the ratio  $R$  between the PSE  
144 at 0° and at 90° over a reasonable range of values of  $R$ .



145 For  $\Theta_a$  angles larger than 0 and less than 90, the values of  $\Theta_p$  generated by Equation 1 imply that  
146 static acoustic targets would be perceived at larger eccentricities than they truly are. Precisely such a  
147 phenomenon has been repeatedly demonstrated in the literature, as listeners have been shown to  
148 regularly overestimate the angle of sound sources [11], particularly when fixating at the front and  
149 using a laser pointer to indicate direction. Equation 1 provides a reasonable fit to the overestimation  
150 of source angle measured in at least three separate laser-pointer studies [8-10] (laser pointing being  
151 the most comparable task condition it does not involve a head movement). The data from the most  
152 relevant portions of these studies are plotted in Figure 3 alongside predictions from the model. The

**FIGURE 3**

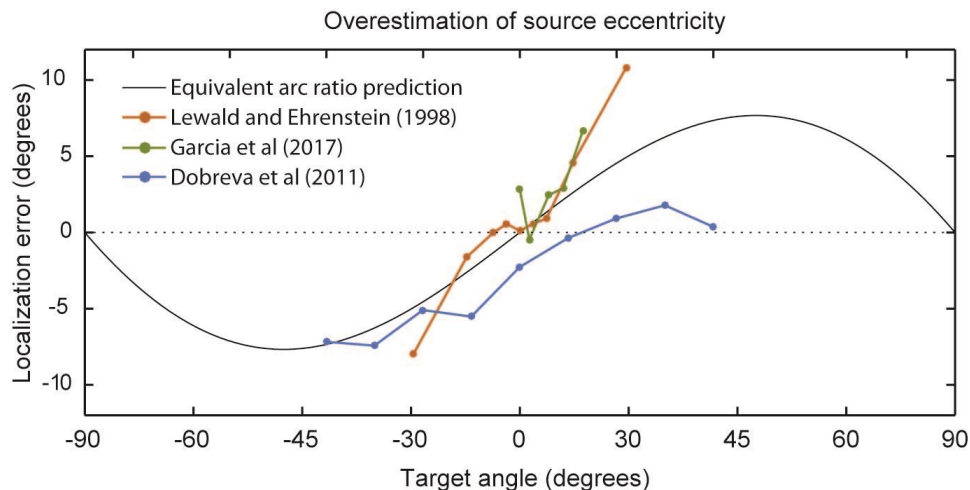

153 predictions are plotted as the difference between perceived and actual locations ( $\Theta_p - \Theta_a$ ), and these  
154 values fall well within the range of the data from the three studies. Physiological data on this subject  
155 are somewhat limited, but predictions of a neural network trained on spike data from cat primary  
156 auditory cortex also show a characteristic overestimation of target position that roughly follows the  
157 predicted pattern [18]. The magnitude of this overestimation, however, is far larger than has been  
158 observed behaviorally or predicted by the current mathematical framework.

### 159 3.3 Distortion in acoustic motion

160 When Equation 1 is used to examine *motion* (by examining the differences in the distortion between  
161  $\theta_a$  and  $\theta_p$  at different head and source angles) it becomes clear that the overestimation of static  
162 signal angle must move with the head. The consequence of this is that signals appear to move in  
163 different ways depending on their subtended angle with respect to the head during a turn. Figure 4  
164 displays the way in which the apparent location of two sound sources (here a bird and a television)  
165 should shift as the listener turns to the right. A signal at  $0^\circ$  should shift to the left and a signal at  $90^\circ$

FIGURE 4

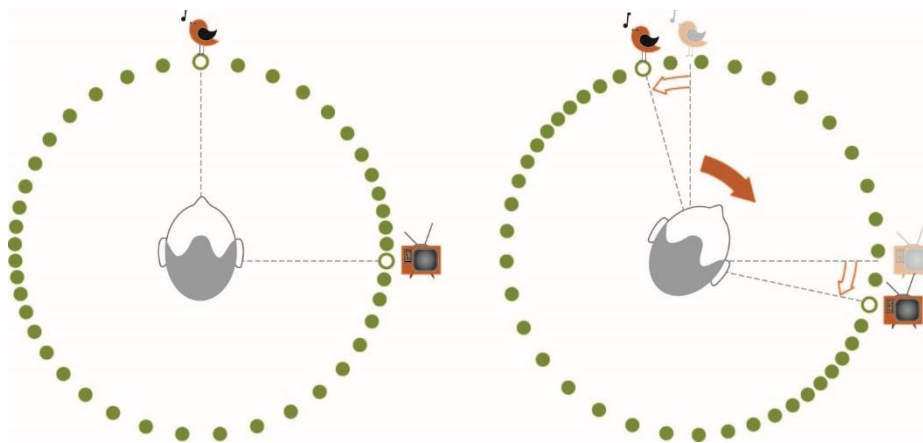

166 should shift to the right. Supplemental Figure S1 is an animation of this phenomenon depicting the  
167 perceived locations of 32 static signals arranged around the head as it turns. The angle of the  
168 listener's nose is depicted as a line along the radius of the circle. The expansion/contraction in Figure  
169 4 and in the animation is exaggerated by a factor of 2 for clarity.

170 There are established phenomena that suggest there are perceptual distortions of auditory space  
171 that depend on some interaction between stimulus angle and head angle. Genzel and colleagues [7]  
172 demonstrated that, after an active head movement, a second sound source had to be shifted in  
173 azimuth to be perceived as being at the same azimuth as a sound before the movement. Within the  
174 framework of the equivalent arc ratio, this may be explainable as a distortion in the perceived  
175 location of a static midline signal. Using Equation 1 (with a  $90^\circ/0^\circ$  PSE ratio of the mean 1.82), a  $35.3^\circ$

176 active rightward movement (the average reported in the study) should result in a  $0^\circ$  signal appearing  
177 to be at  $-6.5^\circ$ , which not only sign-correct, it is also reasonably close to the value of  $-5.5^\circ$  from Genzel  
178 et al (2016). Other systematic errors in movement compensation have also been documented. For  
179 example, Freeman et al [6] demonstrated that signals at the front of the listener must be moved  
180 with the head with a gain of  $+0.17$  to be judged as being static. Here gain refers to amount of motion  
181 with respect to the head, so if a listener turns  $10^\circ$  to the right, signals that move by  $+1.7^\circ$  to the right  
182 would be most consistently judged to be static. The corresponding value predicted by Equation 1 is  
183  $+2.2^\circ$ , which is at least sign-correct if not a perfect match.

184 Physiological data on the relationship between self motion and spatial receptive fields is virtually  
185 non-existent, making comparisons with animal work problematic. Eye position has been shown to  
186 clearly influence the apparent spatial location of auditory signals [19, 20], to modulate responses in  
187 the inferior colliculus [21] and auditory cortex [22], and to actively shift spatial receptive fields in  
188 superior colliculus [23], but little work has been done on head movements. Very recently, however,  
189 experiments in ferret primary auditory cortex have revealed a subpopulation of neurons whose  
190 spatial receptive fields appear to be specified in world-centric coordinates, rotated in opposition to  
191 the animal's movement [24]. This finding represents a neural correlate of our percept of a stable  
192 acoustic world. It is not currently possible, however to determine whether the shifts in receptive  
193 field boundaries as a function of eccentricity match that predicted by the equivalent arc ratio  
194 because the width and contralateral offset of cortical receptive fields make it difficult to assign  
195 individual neurons to exact azimuths in space.

196 Returning to psychophysics work, results from the Freeman et al (2016) study are roughly in line with  
197 what the equivalent arc ratio model would predict, with one notable exception. According to the  
198 model, the gain at which signals must be moved to be judged as static should change as a function of  
199 azimuth, reducing to 0 when  $45^\circ$  is reached, and even changing to a *counter*-rotation for larger  
200 eccentricities. The Freeman et al study did not find this, although they did find a decrease in gain and

201 a substantial increase in variance as a function of stimulus angle. It should be noted that these  
202 authors' own Bayesian explanation for the non-unity gain *also* predicts a change in gain as a function  
203 of azimuth. But the subjects in that study were blindfolded, so the discrepancy may point to an as-  
204 yet unresolved role of eye position in this and related phenomena. The previously mentioned  
205 dependence of neural and behavioral responses on eye position certainly attest to this possibility. A  
206 related phenomenon was previously described by Lewald and Ehrenstein [5]; the displacement of  
207 the subjective auditory midline (as measured using ILD) towards the trunk as a listener turns to more  
208 eccentric head angles. This displacement was argued as being the result of an 'incomplete  
209 coordinate transformation,' a failure of listeners to fully compensate for their own movement. Taken  
210 together with the results from Freeman et al [6] this suggests that head-to-trunk angle may  
211 represent a second unresolved factor that results in a shift in target location into a different region of  
212 expansion / contraction of acoustic space.

213 Studies examining representational momentum have argued that the faster a signal is rotating  
214 around the head, the further the perceived endpoint will be displaced in space [e.g., 25, 26]. This is  
215 argued to be a consequence of a mental extrapolation of the signal's trajectory [27]. According to  
216 the equivalent arc model, signals moving towards the midline would appear to accelerate, suggesting  
217 their endpoints could seem more displaced than those of signals receding from the midline. An  
218 advantage in direction discrimination has been demonstrated for signals approaching the median  
219 plane [28], congruent with the equivalent arc model, but in the case of the first representational  
220 motion study [25] all the motion trajectories used were across the midline. The analysis in the  
221 second study [26] – while it did examine left versus right movements – collapsed the data across  
222 different center azimuths, an averaging method that would prevent us from observing any  
223 asymmetry predicted by the equivalent arc ratio model. Examination of the latter data set could  
224 either lend support to or require a re-evaluation of the equivalent arc framework.

### 225 3.5 The relationship between the equivalent arc ratio and the MAMA

226 The equivalent arc ratio expansion observed appears to be related to – but not entirely dependent  
227 on – the change in MAMA as a function of angle (the MAMA being roughly 1° in front of the listener  
228 and increasing to about 4° at the side [4]). If the equivalent arc ratio were a simply the result of the  
229 change in MAMA as a function of angle, then we might expect slightly larger equivalent arc ratios  
230 between 0° and 90° than we observed. However, the two measurements may be linked with each  
231 other on some level, as acoustic movement, whether a consequence of source or self motion, may  
232 rely on similar underlying processing mechanisms [c.f. 29]. We did not test the MAMA at 0°, 45°, and  
233 90° in our listeners, so we cannot at this point describe the correlation between the two measures.

### 234 3.6 Creating hyper-stable virtual acoustics

235 Because listeners may perceive signals to move at different velocities at different points in the arc  
236 around the head, the equivalent arc ratio could be utilized alongside individualized head related  
237 transfer functions and motion tracking to produce head-stabilized acoustic environments that  
238 appear to be more stable than the real world. As seen from the scatter in Figure 2, the PSE ratio can  
239 vary greatly from listener to listener. As such this must be measured or approximated through other  
240 means to match a given listener's spatial distortion. Given the close relationship between the  
241 equivalent arc predictions and previously described overestimations of target angle, it may be  
242 sufficient simply to have a listener point to a few sound sources with a laser. Regardless of how this  
243 is measured, an inverse of Equation 1 that is solved for  $\theta_a$  would be necessary. This is included here  
244 as Equation 2.

245 Equation 2:

$$246 \theta_a = \frac{\ln(10) \times \tanh^{-1} \left( \theta_p \tanh \left( \frac{\ln(R t - c)}{\ln(10)} \right) \right)}{\ln(R t - c)}$$

247 where the constants and definitions in the formula are the same as in Equation 1.

248 This formula allows one to determine the angles at a signal must be presented to be perceived at a  
249 particular azimuth with respect to the head.

### 250 3.7 Caveats

251 The range of movement excursions in this study was not sufficient to compare references at 0° and  
252 test signals at 90° for all listeners. We did not anticipate the magnitude of the spatial expansion that  
253 we observed and so were not able to fully bracket the motion values and measure PSE ratios for all  
254 movement pairs. We were able to measure PSE ratios for the inverse of these particular  
255 reference/test pairs, but direct comparison between these makes the tacit assumption that the  
256 amount of spatial expansion/contraction is a simply a multiple of the reference motion.

257 It should be also noted that Equation 1, while it may be reasonably applicable to perceptual  
258 distortion of signal location in the listener's front hemifield they may not accurately reflect any  
259 expansion or contraction of auditory space in the *rear* hemifield (and indeed Equation 1 is not  
260 constructed to compute the perceived location of angles beyond  $\pm 90^\circ$ ). We have no data that speaks  
261 to this, so the expansion and contraction in the rear hemifield is depicted in Figure 4 and  
262 Supplemental Figure S1 as a mirror reflection of the front, despite there being no reason to believe  
263 this is necessarily the case. It remains for future studies to map out spatial distortions for 360°  
264 around the head.

265 More generally speaking, since expansion estimates were only measured at three angles, it is unclear  
266 whether a hyperbolic tangent expansion or some other function may be the most appropriate  
267 mathematical descriptor of the change in equivalent arc ratio over all azimuths. Future work will be  
268 required to determine what function best captures the observed phenomena but – provided the  
269 function is readily invertible – such a technique could potentially increase the experience of  
270 immersion for virtual reality systems.

## 271 3.8 Conclusions

272 Sound sources at the side of a listener must move at least twice as much as ones in front to be  
273 judged as moving the same amount. This expansion of space in the front and compression at the side  
274 that moves with the listener we term the equivalent arc ratio, and likely has real consequences for  
275 spatial perception in dynamic listening situations. The prediction that the apparent location of static  
276 sound sources may also be distorted suggests that this phenomenon is not limited to moving signals.  
277 A mathematical model that mimics the equivalent arc ratio can be used to successfully predict  
278 several previously unexplained phenomena in spatial auditory perception. We further suggest that  
279 the inverse of this function could be utilized alongside individualized head related transfer functions  
280 and motion tracking to produce head-stabilized virtual acoustic environments that appear to be  
281 more stable than the real world.

## 282 4 Materials and Methods

### 283 4.1 Participants

284 We recruited 30 normal-hearing listeners, with normal hearing being defined as a four-frequency  
285 average pure tone hearing threshold of less than 20 dB HL. Five listeners were excluded from the  
286 analysis because they did not complete the full set of trials. We collected complete data sets for the  
287 remaining 25 listeners, the result of two separate visits to the lab, with sessions of 60 minutes each.  
288 The average age of the listeners was 27 ( $\pm 7.3$  STD) years, ranging from 22 to 58 years old. We  
289 received written and verbal informed consent from all subjects and the experiment was conducted  
290 in accordance with procedures approved by the West of Scotland Research Ethics Service.

### 291 4.2 Stimuli and Presentation

292 The experiment was conducted in a 4.8 x 3.9 x 2.75 m double walled, sound-attenuated chamber  
293 that had 10 cm acoustic wedge foam lining the walls and ceiling, but not the floor, which was  
294 carpeted. The listeners were seated in this chamber in the center of a 3.5 m diameter circular ring of  
295 24 Tannoy VX-6 loudspeakers (Tannoy, Coatbridge, UK) placed at intervals of 15°. Because a forward  
296 (towards the 0° loudspeaker) offset in listener position could yield an apparent expansion in space,

297 the listener's head was aligned with a spot on the ceiling and the floor. This method, while subject to  
298 a few centimeters of error, prevented a misplacement that could explain the results observed (which  
299 would require the listener to be at least an order of magnitude closer to the front loudspeaker). The  
300 room was dimly lit, but the loudspeakers were visible, and listeners were asked to keep their head  
301 still and their eyes open and fixated on the loudspeaker ahead of them at 0°. Signal sources were  
302 moved around the ring using vector-based amplitude panning (performed on a sample-by-sample  
303 basis in Matlab 2015b (The Mathworks, Natick, MA, USA) using the open source dynamic link library  
304 "playrec" ([www.playrec.co.uk](http://www.playrec.co.uk))). The signals were played out using a MOTU 24 I/O (Mark of the  
305 Unicorn, Cambridge, MA, USA) over ART SLA-4 amplifiers (Applied Research & Technology ProAudio,  
306 Niagara Falls, NY, USA). The stimuli were unfrozen pink noise signals that were amplitude modulated  
307 with a 10 Hz reverse sawtooth waveform at a depth of 50%. These signals provided sufficient high  
308 frequency energy to provide robust interaural level differences as well as frequent sharp onset  
309 transients to ensure that the signals were easily localizable. All signals were presented at a  
310 comfortable listener-determined listening level (this ended up being between 70 and 75 dB SPL).

### 311 4.3 Experimental Paradigm

312 We measured the point of subjective equality (PSE) for amount of acoustic motion between "test"  
313 and "reference" signals. The reference signal always moved 20° in a random direction and the test

FIGURE 5

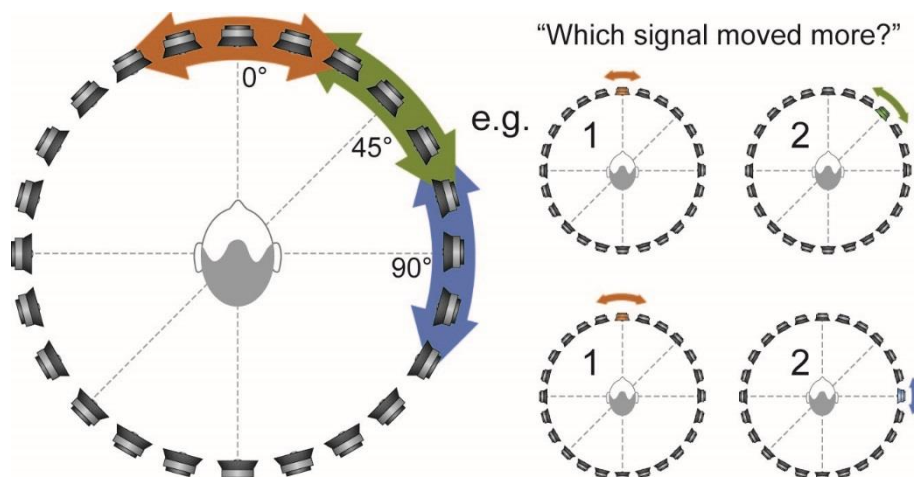



314 signal moved either less, the same, or more (5, 10, 15, 20, 25, 30, or 35°), also in a random direction  
315 (see Figure 5). The order of the test and reference signals was also randomized. In a two-alternative  
316 forced choice paradigm, listeners were asked to report on a touchscreen whether the first or second  
317 signal ‘moved more.’ If the listeners requested clarification on these instructions, they were told that  
318 their task was to report whether the first or second noise moved over a larger distance in space,  
319 regardless of its duration or apparent speed. Both the reference and the test signals could be  
320 centred at either 0°, 45°, or 90° (See Figure 5) plus or minus a random value drawn from a uniform  
321 distribution between -7.5 and 7.5°. The duration of the test and reference signals were individually  
322 randomized on every trial to a value between 0.5 and 2 seconds. In this way, we mitigated velocity  
323 and duration as potential cues, leaving total angular excursion as the variable that listeners were  
324 asked to judge. Listeners were asked to complete a total of 10 blocks of 126 trials, each of which  
325 contained 6 repeats of the 21 conditions.

326 The resulting psychometric functions for each listener were individually fitted with a logistic function  
327 using Matlab’s `fminsearch` function. The resulting parameters were fed into an inverse logistic  
328 equation to compute the test excursion value at which the function crossed the PSE (the reader may  
329 roughly infer these values in Figure 1 as the point where the mean fit (dotted line) crosses 0.5 on the  
330 y-axis). For logistic fits that did not cross the PSE before 40° (the next larger measurement point  
331 step) we fixed the value at 40°. This likely underestimates the true PSE for many listeners, but avoids  
332 excessive extrapolation. This value was divided by the reference excursion of 20° to yield a ratio  
333 expressing the amount of expansion or contraction of auditory space.

#### 334 4.4 Statistics

335 All statistics were performed with the Statistics Toolbox in Matlab 2016a. The analysis consisted of a  
336 three-way repeated measures ANOVA with the dependent variable being the proportion of ‘moved  
337 more’ responses, and the independent variables being reference angle, test angle, and test  
338 excursion. Alpha was set to 0.05.

## 339 Funding

340 The author was supported by intramural funding from the Medical Research Council (grant number  
341 U135097131) and the Chief Scientist Office of the Scottish Government.

## 342 Acknowledgements

343 Thanks to Kay Wright-Whyte and Jack Holman for help collecting data and Graham Naylor and Alan  
344 Archer-Boyd for reading drafts of this manuscript.

## 345 References

- 346 1. Howard, D.M., and Angus, J. (2009). *Acoustics and psychoacoustics*, (Taylor &  
347 Francis).
- 348 2. Blauert, J. (1983). *Spatial hearing*, (Cambridge: Mit Press).
- 349 3. Perrott, D.R., and Saberi, K. (1990). Minimum audible angle thresholds for sources  
350 varying in both elevation and azimuth. *Journal of the Acoustical Society of America*  
351 *87*, 1728-1731.
- 352 4. Strybel, T.Z., Manllgas, C.L., and Perrott, D.R. (1992). Minimum audible movement  
353 angle as a function of the azimuth and elevation of the source. *Human Factors: The*  
354 *Journal of the Human Factors and Ergonomics Society* *34*, 267-275.
- 355 5. Lewald, J., and Ehrenstein, W.H. (1998). Influence of head-to-trunk position on sound  
356 lateralization. *Experimental Brain Research* *121*, 230-238.
- 357 6. Freeman, T.C., Culling, J.F., Akeroyd, M.A., and Brimijoin, W.O. (2016). Auditory  
358 Compensation for Head Rotation Is Incomplete.
- 359 7. Genzel, D., Firzlaff, U., Wiegrebe, L., and MacNeilage, P. (2016). Dependence of  
360 auditory spatial updating on vestibular, proprioceptive, and efference copy signals.  
361 *Journal of neurophysiology*.
- 362 8. Lewald, J., and Ehrenstein, W.H. (1998). Auditory-visual spatial integration: a new  
363 psychophysical approach using laser pointing to acoustic targets. *Journal of the*  
364 *Acoustical Society of America* *104*, 1586-1597.
- 365 9. Garcia, S.E., Jones, P.R., Rubin, G.S., and Nardini, M. (2017). Auditory Localisation  
366 Biases Increase with Sensory Uncertainty. *Scientific Reports* *7*, 40567.
- 367 10. Dobрева, M.S., O'Neill, W.E., and Paige, G.D. (2011). Influence of aging on human  
368 sound localization. *Journal of neurophysiology* *105*, 2471-2486.
- 369 11. Carlile, S., Leong, P., and Hyams, S. (1997). The nature and distribution of errors in  
370 sound localization by human listeners. *Hearing research* *114*, 179-196.
- 371 12. Moore, B.C., and Glasberg, B.R. (1983). Suggested formulae for calculating auditory-  
372 filter bandwidths and excitation patterns. *The Journal of the Acoustical Society of*  
373 *America* *74*, 750-753.
- 374 13. Smeets, J.B., and Brenner, E. (1995). Perception and action are based on the same  
375 visual information: distinction between position and velocity. *Journal of*  
376 *Experimental Psychology: Human Perception and Performance* *21*, 19.

- 377 14. Whitney, D., and Cavanagh, P. (2000). Motion distorts visual space: shifting the  
378 perceived position of remote stationary objects. *Nature neuroscience* 3, 954-959.
- 379 15. Tootell, R.B., Reppas, J.B., Dale, A.M., and Look, R.B. (1995). Visual motion aftereffect  
380 in human cortical area MT revealed by functional magnetic resonance imaging.  
381 *Nature* 375, 139.
- 382 16. Tanaka, K., and Saito, H.-A. (1989). Analysis of motion of the visual field by direction,  
383 expansion/contraction, and rotation cells clustered in the dorsal part of the medial  
384 superior temporal area of the macaque monkey. *Journal of neurophysiology* 62, 626-  
385 641.
- 386 17. Poirier, C., Baumann, S., Dheerendra, P., Joly, O., Hunter, D., Balezeau, F., Sun, L.,  
387 Rees, A., Petkov, C.I., Thiele, A., et al. (2017). Auditory motion-specific mechanisms in  
388 the primate brain. *PLOS Biology* 15, e2001379.
- 389 18. Middlebrooks, J.C., Xu, L., Eddins, A.C., and Green, D.M. (1998). Codes for sound-  
390 source location in nontopographic auditory cortex. *Journal of neurophysiology* 80, 863-  
391 881.
- 392 19. Lewald, J. (1998). The effect of gaze eccentricity on perceived sound direction and its  
393 relation to visual localization. *Hearing research* 115, 206-216.
- 394 20. Lewald, J., and Ehrenstein, W.H. (1996). The effect of eye position on auditory  
395 lateralization. *Experimental brain research. Experimentelle Hirnforschung* 108, 473-  
396 485.
- 397 21. Groh, J.M., Trause, A.S., Underhill, A.M., Clark, K.R., and Inati, S. (2001). Eye position  
398 influences auditory responses in primate inferior colliculus. *Neuron* 29, 509-518.
- 399 22. Werner-Reiss, U., Kelly, K.A., Trause, A.S., Underhill, A.M., and Groh, J.M. (2003). Eye  
400 position affects activity in primary auditory cortex of primates. *Curr Biol* 13, 554-562.
- 401 23. Jay, M.F., and Sparks, D.L. (1984). Auditory receptive fields in primate superior  
402 colliculus shift with changes in eye position. *Nature*, 345-347.
- 403 24. Town, S.M., Brimijoin, W.O., and Bizley, J.K. (2017). Egocentric and Allocentric  
404 Representations in Auditory Cortex. *bioRxiv*, 098525.
- 405 25. Carlile, S., and Best, V. (2002). Discrimination of sound source velocity in human  
406 listeners. *The Journal of the Acoustical Society of America* 111, 1026-1035.
- 407 26. Getzmann, S., Lewald, J., and Guski, R. (2004). Representational momentum in  
408 spatial hearing. *Perception* 33, 591-599.
- 409 27. Getzmann, S., and Lewald, J. (2007). Localization of moving sound. *Perception &*  
410 *psychophysics* 69, 1022-1034.
- 411 28. Hirnstein, M., Hausmann, M., and Lewald, J. (2007). Functional cerebral asymmetry  
412 in auditory motion perception. *Laterality* 12, 87-99.
- 413 29. Brimijoin, W.O., and Akeroyd, M.A. (2014). The moving minimum audible angle is  
414 smaller during self motion than during source motion. *Auditory Cognitive*  
415 *Neuroscience* 8, 273.

## 417 Figure Legends

418 **Figure 1.** Psychometric functions for motion comparisons and points of subjective similarity (PSE)  
419 for motion for moving signals centered at 0°, 45°, and 90°. A) For conditions with a reference signal  
420 at 0°, the psychometric function for test signals also at 0° crossed the PSE at 20 degrees (orange line),  
421 whereas test signals at 45° and 90° (green and blue, respectively) had to move more to be judged as  
422 moving the same amount (rightward shift in the curves). B) Compared to 45° reference signals, 0°  
423 test signals had to be moved less (orange) and 90° signals more (blue) to be judged as moving the  
424 same amount. C). References of 90° required less motion to be judged the same as both the 0°  
425 (orange) or the 45° (green) test signals.

426 **Figure 2.** Scatter plot of PSE ratios showing an expansion of auditory space. All x values are jittered  
427 for visibility. PSE ratio increases as a function of the absolute difference between test and reference  
428 angles. The different symbols represent actual angle comparisons, some values for which were  
429 inverted from test/reference to reference/test. Triangle symbols represent measurements in which  
430 the test signals at maximum excursion were still not judged to be moving by the same amount as the  
431 20° reference motion.

432 **Figure 3.** Predictions of overestimation of source eccentricity as a function of target angle. Data  
433 demonstrating that listeners overestimate target angles are displayed from three separate previous  
434 studies (colored dot symbols) alongside predictions of angle overestimation from Equation 1 (black  
435 line).

436 **Figure 4.** Illustration of the spatial distortion introduced by the equivalent arc ratio. The  
437 dots represent the perceived locations of 32 static signals arranged around the head as it  
438 turns to the right. The apparent location of a signal at the front moves leftward, whereas a

439 signal at the right should appear move further to the right. The expansion represented here is  
440 exaggerated by a factor of 2 for the purpose of more clearly illustrating the phenomenon.

441 [Figure 5](#). Experimental Paradigm: Listeners were presented with moving reference (20°) and test  
442 signals (variable °) at three possible center angles (0°, 45°, and 90°), randomized in order, and asked  
443 to report which of the two signals moved more.

444 [Supplemental Figure S1](#). Animation of the spatial distortion introduced by the equivalent arc  
445 ratio. The dots represent the perceived locations of 32 static signals arranged around the head  
446 as it turns. The angle of the head is represented by the line along the radius of the circle. The  
447 expansion represented here is exaggerated by a factor of 2 for the purpose of more clearly  
448 illustrating the phenomenon.

#### SUPPLEMENTAL FIGURE S1

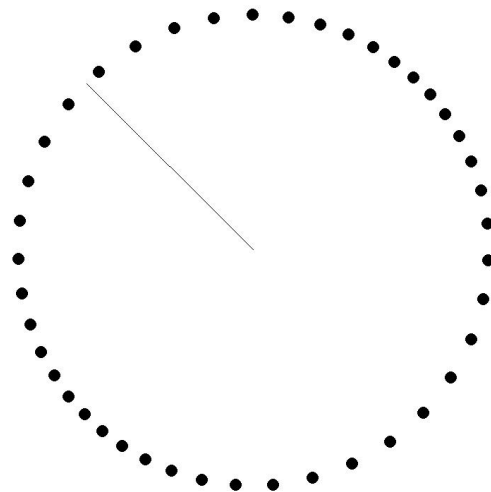

Source: http://www.biorxiv.org/content/10.1101/134700v2.full.pdf
